# Supplementary material for: Merlin is required for coordinating proliferation of two stem cell lineages in the Drosophila testis
Source: PubMed Central journal article supplement (PMC5451480; doi:10.1038/s41598-017-02768-z), 2017-05-31
Supplement: 41598_2017_2768_MOESM1_ESM.pdf [file 41598_2017_2768_MOESM1_ESM.pdf]

## Supplementary Information

### ***Merlin* is required for coordinating proliferation of two stem cell lineages in the *Drosophila* testis**

Mayu Inaba,<sup>1, 2, 3, \*\*</sup> Dorothy R. Sorenson,<sup>2</sup> Matt Kortus,<sup>2</sup> Viktoria Salzmann,<sup>1, 2</sup> and Yukiko M. Yamashita<sup>1, 2, 3, \*</sup>

<sup>1</sup>Life Sciences Institute, Center for Stem Cell Biology, <sup>2</sup>Department of Cell and Developmental Biology, School of Medicine, <sup>3</sup>Howard Hughes Medical Institute, University of Michigan, Ann Arbor,

\*To whom correspondence should be addressed: Yukiko M. Yamashita, 210 Washtenaw Ave, Rm5403, University of Michigan, Ann Arbor, MI 48109, USA  
Tel: 734-615-8508; Email: [yukikomy@umich.edu](mailto:yukikomy@umich.edu)

\*\*Present address: 263 Farmington Ave. E6053, Department of Cell Biology, UConn Health, Farmington, CT 06030, USA

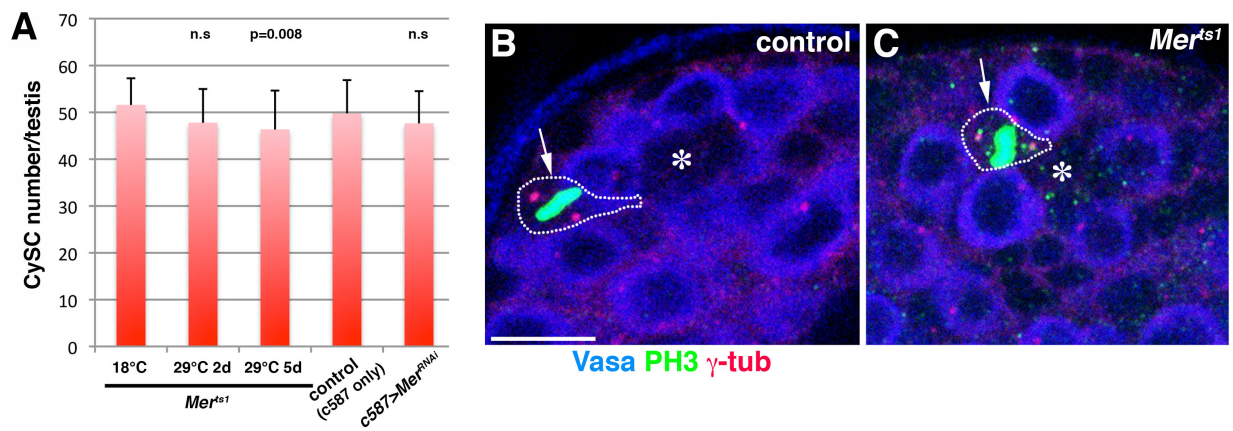

**Figure S1. The effect of *Mer* mutation/knockdown on CySCs.**

A) The number of Zfh-1<sup>+</sup> cells/testis in *Mer<sup>ts1</sup>* mutant and *c587-gal4>UAS-Mer<sup>RNAi</sup>* testes.

B, C) Examples of mitotic CySCs (arrows) in control (B) and *Mer<sup>ts1</sup>* mutant (C, 29°C) testes, where CySC mitoses were limited to next to the hub. Bar 10 $\mu$ m.

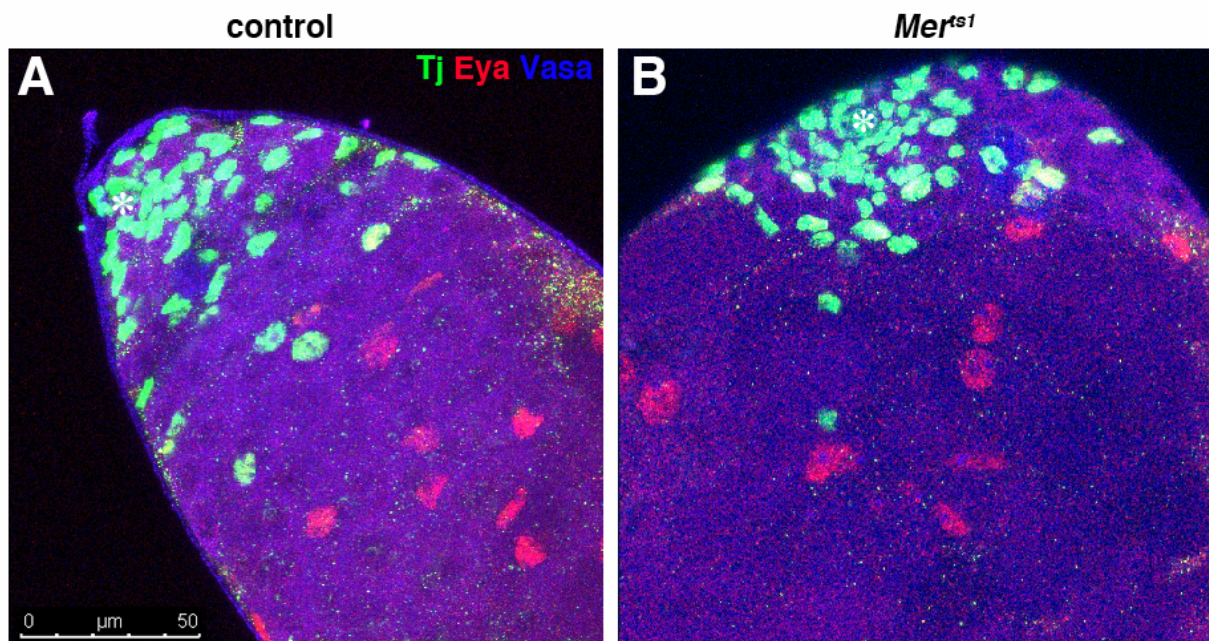

**Figure S2. *Mer* mutant cyst cells differentiate normally.**

Control (A) and *Mer<sup>ts1</sup>* (B) testes stained with anti-Tj, -Eya, and -Vasa antibodies, demonstrating that CCs differentiate normally into Eya-positive cells.

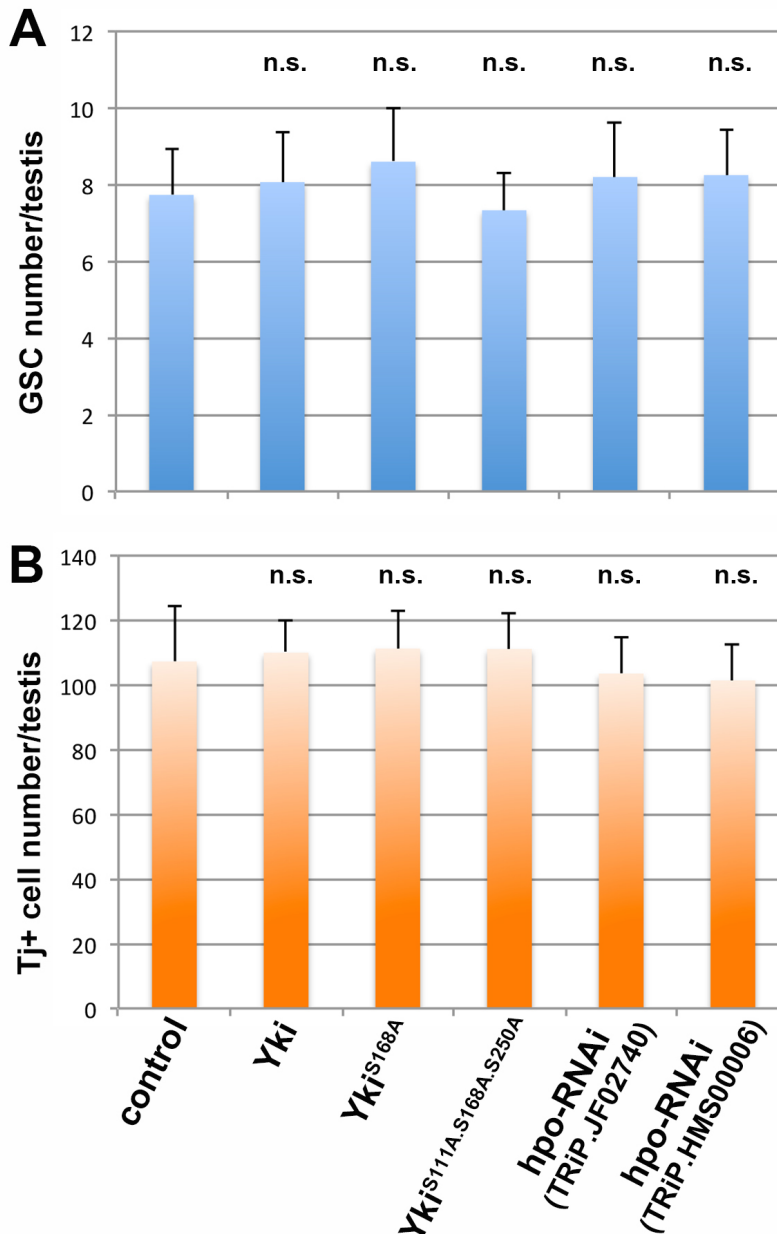

**Figure S3. Neither Yki nor Hippo regulates Tj+ cyst cell number.**

*Yki*, its nonphosphorylatable forms, and two independent RNAi constructs were expressed under the control of *c587-gal4* and combined with *tubulin-gal80<sup>ts</sup>*. The flies were cultured at 18°C until eclosion to avoid lethality during development, then transferred to 29°C for 7 days to allow transgene expression before analysis. Expression of neither *yki* nor *hpo*<sup>RNAi</sup> affected either GSC number (A) or Tj+ cyst cell number (B).



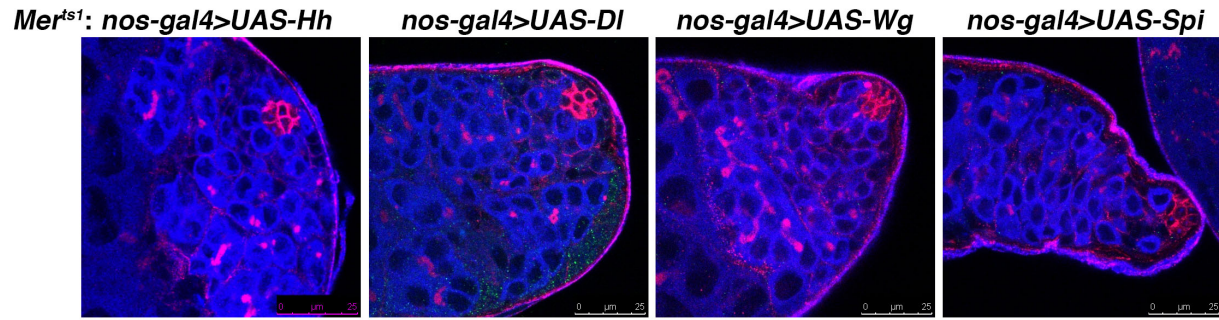

**Figure S4. Unchanged overall tissue architecture of testes upon overexpression of *Hh*, *Dl*, *Wg* or *Spi* in *Mer<sup>ts1</sup>* mutant background.**  
Blue: Vasa, Red: FasIII and Add

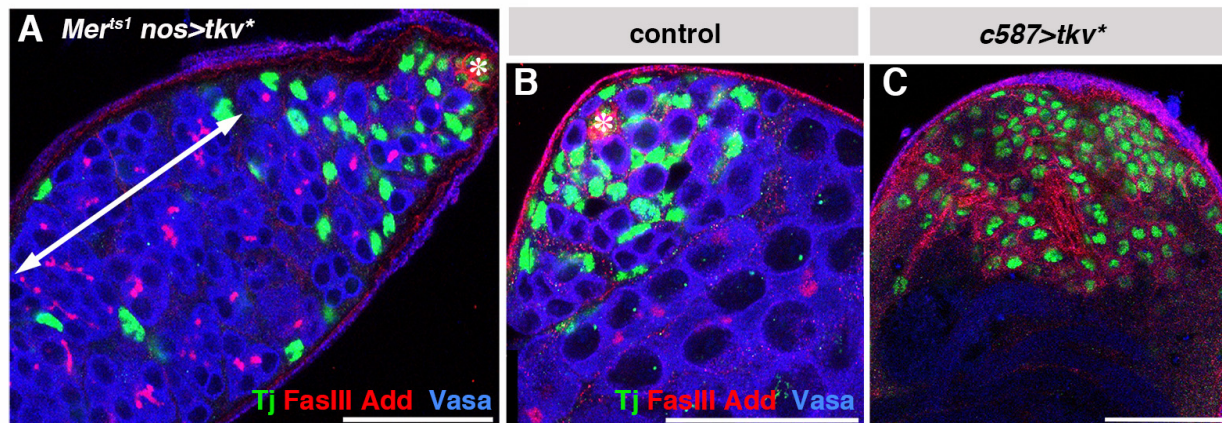

**Figure S5. Dpp-Tkv signaling in somatic CySCs/CCs regulates CySC proliferation.**

A) *Mer<sup>ts1</sup> nos-gal4>UAS-tkv\** shows spermatogonial overproliferation (double-headed arrow) but not tumorous expansion of CCs.

B, C) Apical tip of the testes in control (B) and *c587-gal4>UAS-tkv\** (C). Expression of *Tkv\** is sufficient to cause CC overproliferation.
